# Supplementary material for: The Use of Standardized Discharge in IPS Supported Employment Programs
Source: Atypon-hosted journal article supplement (doi:10.1176/appi.ps.201700309), 2018-01-16
Supplement: appi.ps.201700309.ds001.pdf [file appi.ps.201700309.ds001.pdf]

## Standardized Discharge in IPS Supported Employment

### Online Supplement

Results of Kaplan-Meier analysis of time to first job comparing recipients of IPS and control conditions over two years of follow-up. Bands indicate 95% confidence limits. Table summarizes results as observed among the 1004 IPS recipients in the Mental Health Treatment Study

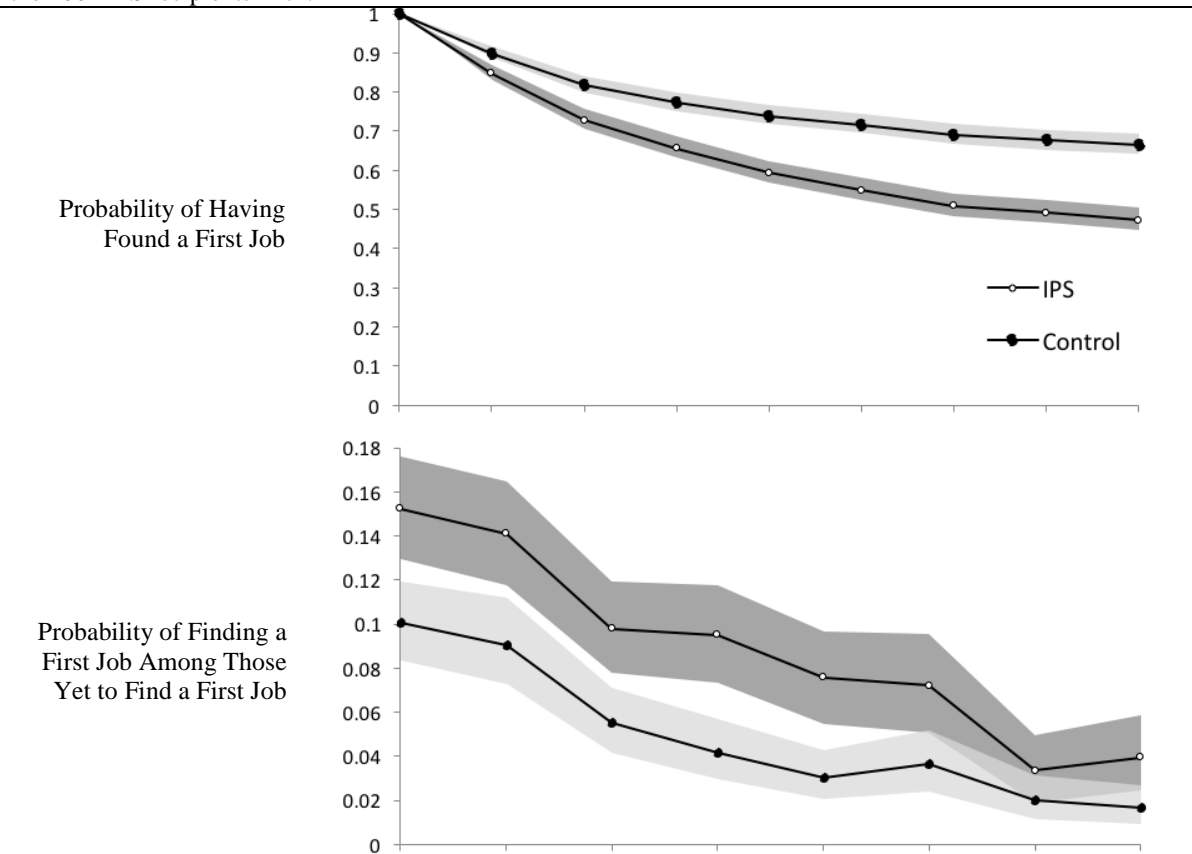

| Month                                                                         | 3     | 6     | 9     | 12    | 15    | 18    | 21   | 24    |
|-------------------------------------------------------------------------------|-------|-------|-------|-------|-------|-------|------|-------|
| Controls (N=1051)                                                             |       |       |       |       |       |       |      |       |
| number yet to find first job                                                  | 945   | 859   | 812   | 778   | 754   | 726   | 711  | 699   |
| number first jobs that quarter                                                | 106   | 86    | 47    | 34    | 24    | 28    | 15   | 12    |
| cumulative first jobs                                                         | 106   | 192   | 239   | 273   | 297   | 325   | 340  | 352   |
| IPS (N=1004)                                                                  |       |       |       |       |       |       |      |       |
| number yet to find first job                                                  | 851   | 731   | 659   | 596   | 551   | 511   | 494  | 474   |
| number first jobs that quarter                                                | 153   | 120   | 72    | 63    | 45    | 40    | 17   | 20    |
| cumulative first jobs                                                         | 153   | 273   | 345   | 408   | 453   | 493   | 510  | 530   |
| median difference between probabilities of finding first jobs (IPS - Control) | .051* | .050* | .042* | .053* | .045* | .036* | .013 | .023* |

\* difference significant ( $\alpha=.05$ )
